# Supplementary material for: Exacerbation of thromboinflammation by JAK2V617F mutation worsens the prognosis of cerebral venous sinus thrombosis
Source: PubMed Central journal article supplement — Blood Adv. 2024 Mar 8;8(12):3330–43. doi: 10.1182/bloodadvances.2023011692 (PMC11258627; doi:10.1182/bloodadvances.2023011692), 2024-03-08
Supplement: BLOODA_ADV-2023-011692-mmc1.pdf [file BLOODA_ADV-2023-011692-mmc1.pdf]

## **SUPPLEMENTARY MATERIALS & DATA**

### **Supplementary materials**

#### *Magnetic Resonance Imaging (MRI) protocol*

The protocol consisted of a T2 and T2\*-weighted imaging sequences. For T2-weighted, repetition time was 2650 ms, with an echo time of 42 ms. With a 256x256 matrix, a field of view of 22x22 mm was scanned with 19 contiguous slices of 0.8-mm thickness. For T2\*-weighted, slices were imaged with repetition time/echo time=600/8 ms, flip angle of 30°, field of view=22x22 mm and matrix=128x128.

#### *Blood sampling*

Blood was collected before and one day after surgery (CVST or sham). Blood sample was withdrawn from the retro-orbital venous sinus using capillary tubes with an appropriate anticoagulant (EDTA, heparin or sodium citrate). EDTA-anticoagulated whole blood count was carried out using a Scil VetABC animal blood analyzer (Viernheim, Germany). To obtain poor-platelet-plasma (PPP), citrated samples were centrifuged twice at 2500g for 15 min at 18°C. PPP samples were immediately frozen and stored at -80°C until use.

#### *Immunohistochemical analyses*

Organs were embedded in paraffin, sliced into 10-µm sections, conducted with hematoxylin-eosin (HE) and Nissl staining to assess haemorrhagic and ischemic brain lesions. For immunofluorescence, brain sections were deparaffinized, rinsed in PBS before permeabilization (0.05% Triton X-100 in PBS, 5 minutes). Sections were blocked with 3% bovine serum albumin (BSA) in PBS for 1 hour. Then, slides were incubated 2 hours at room temperature with various combinations of appropriate primary antibodies to stain neutrophils, platelets, endothelium and immunoglobulin G through injury area (Table S1). Brain sections were rinsed before incubation with corresponding secondary antibodies, under the same conditions as previously mentioned. DNA was finally counterstained using 6-diamidino-2-phenylindole. Red blood cells (RBC) were visualized via their inherent auto-fluorescence. Negative controls of the immunofluorescent staining were achieved by omission of the primary antibody on control slices. Images were acquired using a laser Axiovert Zeiss fluorescence microscope (Oberkochen, Germany) and processed using ImageJ

software (National Institutes of Health). Quantitative assessment of neutrophil and intravascular fibrin deposits was performed in non-haemorrhagic cortical parenchyma using ImageJ software (National Institutes of Health).

**Table S1:** List of antibodies used for immunofluorescence studies related to experimental procedure

| Target                | Marker               | Company (Cat#)             | Species | Conjugate | Dilution |
|-----------------------|----------------------|----------------------------|---------|-----------|----------|
| MPO                   | Neutrophils          | Dako (A0398)               | Rabbit  | -         | 1: 330   |
| GPIX                  | Platelets            | Emfret (M-051-0)           | Rat     | -         | 1: 50    |
| GLUT-1                | Cerebral Endothelium | Merck millipore, (07-1401) | Rabbit  | -         | 1: 1000  |
| Fibrin                | Fibrin               | Merck millipore, (59D8)    | Mouse   | AF555     | 1:400    |
| DAPI                  | DNA                  | Invitrogen                 | -       | -         | 1: 1000  |
| Goat IgG              | Secondary antibody   | Invitrogen (A-32732)       | Rabbit  | AF555     | 1: 500   |
| Donkey IgG            | Secondary antibody   | Jackson (712-607-003)      | Rat     | AF647     | 1: 500   |
| Sheep IgG             | Secondary antibody   | Jackson (313-607-003)      | Rabbit  | AF647     | 1: 500   |
| Goat IgG              | IgG                  | ThermoFisher (A-21237)     | Mouse   | AF647     | 1: 500   |
| <i>AF: Alexafluor</i> |                      |                            |         |           |          |

## Supplemental data

**Table S2: Hematological parameters in *Jak2<sup>WT</sup>* and *Jak2<sup>V617F</sup>* mice at baseline and at day 1 (D1) after CVST.**

Results are expressed as mean  $\pm$ SD (n=20). Statistical analysis was performed using student t-test. Data were compared (a) between *Jak2<sup>WT</sup>* and *Jak2<sup>V617F</sup>* mice at baseline, (b) between baseline and D1 in each group. ns: not significant. SII: Systemic Immune Inflammation Index (Platelet (G/L)  $\times$  neutrophil (G/L) / Lymphocyte (G/L)).

|                                    | Baseline                 |                             |                             | CVST D1                  |                             |                             |
|------------------------------------|--------------------------|-----------------------------|-----------------------------|--------------------------|-----------------------------|-----------------------------|
|                                    | <i>Jak2<sup>WT</sup></i> | <i>Jak2<sup>V617F</sup></i> | <i>p value</i> <sup>a</sup> | <i>Jak2<sup>WT</sup></i> | <i>Jak2<sup>V617F</sup></i> | <i>p value</i> <sup>b</sup> |
| White Blood Cells, $\times 10^9/L$ | 10.5 $\pm$ 3.5           | 15 $\pm$ 3.3                | <0.01                       | 7.2 $\pm$ 1.9            | 21 $\pm$ 9.7                | ns                          |
| Neutrophils, $\times 10^9/L$       | 2.2 $\pm$ 0.7            | 4.8 $\pm$ 1                 | < 0.0001                    | 1.5 $\pm$ 0.8            | 8 $\pm$ 3.4                 | ns                          |
| Haemoglobin, g/dL                  | 13.5 $\pm$ 1.1           | 18.4 $\pm$ 1.9              | < 0.0001                    | 11.5 $\pm$ 2.4           | 17.2 $\pm$ 1.8              | ns                          |
| Haematocrit, %                     | 43 $\pm$ 5.6             | 59.7 $\pm$ 8.6              | < 0.0001                    | 38 $\pm$ 10              | 58.6 $\pm$ 6.7              | ns                          |
| Platelets, $\times 10^9/L$         | 914 $\pm$ 171            | 1014 $\pm$ 106              | ns                          | 984 $\pm$ 180            | 1201 $\pm$ 221              | ns                          |
| SII index                          | 72 $\pm$ 37              | 400 $\pm$ 83                | <0.01                       | 163 $\pm$ 51             | 802 $\pm$ 185               | <0.05                       |

**Table S3: Characteristics of patients with CVST and *JAK2<sup>V617F</sup>* mutation.**

| Patient | Gender | Age (years) | Hb, g/dL | Ht, % | WBC, $\times 10^9/L$ | Neutrophils, $\times 10^9/L$ | PLT, $\times 10^9/L$ | <i>JAK2<sup>V617F</sup></i> allelic burden (%) |
|---------|--------|-------------|----------|-------|----------------------|------------------------------|----------------------|------------------------------------------------|
| 1       | F      | 73          | 16.7     | 53    | 24.7                 | 20                           | 155                  | 48                                             |
| 2       | F      | 74          | 21.5     | 63    | 23.4                 | 21.5                         | 133                  | 81                                             |
| 3       | F      | 24          | 13.1     | 41    | 7.2                  | 4.4                          | 643                  | 15                                             |
| 4       | F      | 33          | 14.2     | 44    | 10.1                 | 6.8                          | 389                  | 4                                              |
| 5       | F      | 76          | 14.1     | 42    | 13.1                 | 11.1                         | 326                  | 9                                              |
| 6       | F      | 26          | 13.6     | 41    | 9.6                  | 6.8                          | 497                  | 11                                             |
| 7       | F      | 42          | 14.1     | 40    | 15.4                 | 11.1                         | 297                  | 7                                              |
| 8       | F      | 79          | 14       | 43    | 11.3                 | 9.1                          | 319                  | 12                                             |
| 9       | F      | 20          | 12.5     | 37    | 6.5                  | 4.8                          | 290                  | 4                                              |

F : Female , Hb : Haemoglobin, Ht : Haematocrit, WBC : White blood cells, PLT : Platelets

**Figure S1: SSS thrombosis induces higher thrombotic expansion at D1 in *Jak2*<sup>V617F</sup> mice.**

(A) Representative images of the cortical parenchyma at day 1 after CVST showing more fibrin (red) in the brain vasculature from *Jak2*<sup>V617F</sup> mice than in *Jak2*<sup>WT</sup> mice. Scale bar: 100  $\mu$ m. (B) The number of fibrin deposits was measured in cortical area of *Jak2*<sup>WT</sup> and *Jak2*<sup>V617F</sup> mice. Results are expressed as mean $\pm$ SD (n=4-6 per group). For each mouse, six images taken at x20 magnification were analysed. Data were analysed using Mann–Whitney’s t test. \*:p<0.05.

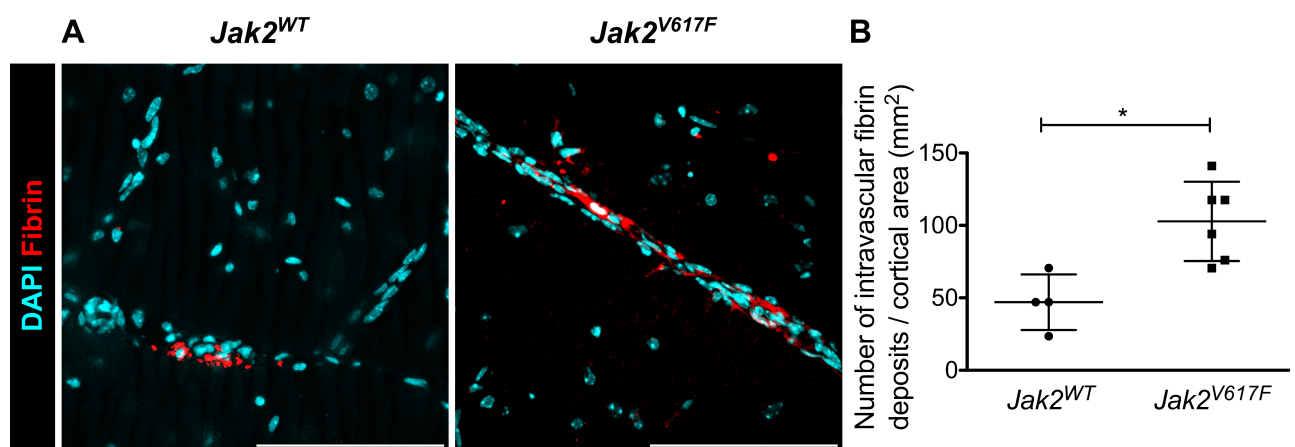

**Figure S2: Plasma levels of platelet factor 4 (PF4) in *Jak2<sup>WT</sup>* and *Jak2<sup>V617F</sup>* mice at baseline and at day 1 (D1) after sham-surgery or CVST.**

Results are expressed as mean±SD, n=7-8 per group. Data are analysed using Kruskal-Wallis test followed by post hoc Dunn's test. \*: p<0.05.

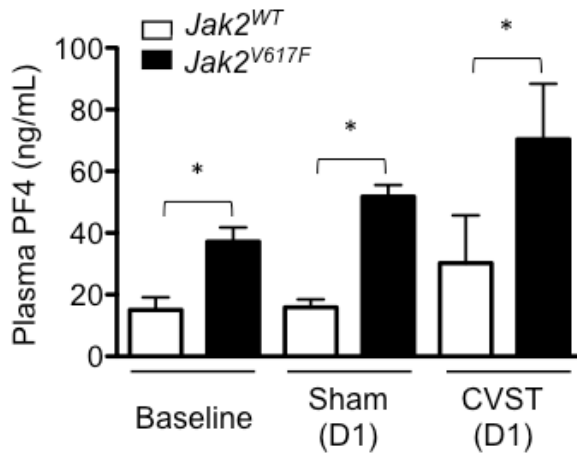

### **Supplemental Video 1:**

Intravital imaging of rhodamine-labeled leukocytes and platelets in  $Jak2^{WT}$  and  $Jak2^{V617F}$  mice after CVST. Note the important margination of leukocytes in venules of  $Jak2^{V617F}$  mice compared to  $Jak2^{WT}$  mice. SSS: Superior sagittal sinus, V: Veins.
